# Supplementary material for: A-Lister: a tool for analysis of differentially expressed omics entities across multiple pairwise comparisons
Source: Springer Nature journal article supplement (doi:10.1186/s12859-019-3121-x), 2019-11-19
Supplement: 12859_2019_3121_MOESM4_ESM.pdf [file 12859_2019_3121_MOESM4_ESM.pdf]

 ReadMe.md

# A-Lister v1.1

A-Lister is a dual interface (CLI & GUI) tool that assists with analysis of differentially expressed entities (DEEs), such as differentially expressed genes (DEGs), differentially expressed proteins (DEPs), and differentially methylated positions/regions (DMPs/DMRs), across multiple pairwise comparisons.

## Installation

Supported Operating Systems: Windows 10, Mac OS (10.10.x+), Unix (Ubuntu, Other).

1. Install Python version 3.7 or higher. <https://www.python.org/downloads/>
2. Check whether you have pip installed. Type pip (or pip3) -V in command line (Windows), terminal (Mac OS), bash shell (Unix). If you do not have pip installed follow these instructions to install pip (python package management system). <https://pip.pypa.io/en/stable/installing/>
3. Install Eel. <https://github.com/ChrisKnott/Eel>

```
pip install eel  
or  
pip3 install eel
```

4. Install Google Chrome.
5. Download A-Lister from GitHub.

## Running A-Lister

To run A-Lister using command line interface (CLI) type `python ALister_CLI.py` while located in A-Lister's directory. This will bring up the help menu with list of available commands. For more information please refer to command line interface documentation below.

To run A-Lister using graphical user interface (GUI) type `python ALister_GUI.py` while located in A-Lister's directory. For more information please refer to graphical user interface documentation below.

We recommend that new users use the GUI to become familiar with A-Lister. The GUI portion of documentation will guide you through complete examples. The CLI is available for those that prefer using command line.

**Note:** Depending on how python is setup on your system you may need to type `python3` instead of `python` within the terminal.

## About/Documentation

### 1. A-Lister Input

Supported File Formats: Theoretically any text delimited file should work. However, A-Lister has only been tested with standard .csv, .tsv, .txt (delimited), and .diff files.

**Name List Mode:**

In this mode A-Lister accepts files containing columns of names delimited by tab or comma. The header row must contain group names for each column. Examples of this format can be found in Sample\_Input/Name\_List folder.

|         |          |          |
|---------|----------|----------|
| Control | Treated1 | Treated2 |
|---------|----------|----------|

| Control | Treated1 | Treated2 |
|---------|----------|----------|
| AADACL2 | AADACP1  | AADACP1  |
| AADACL4 | DUSP5P1  | AMICA1   |

#### Differential Expression Mode:

In this mode, A-Lister accepts differential expression files containing a primary id column (e.g. gene name), fold change column(s), and any other columns present. The columns in these files must be delimited by tab, comma, colon, semicolon, or space. A-Lister supports two types of differential expression file formats described below.

##### 1. Differential Expression Sample Format (DE-Sample) (Row-Format) File:

This is a delimited text file containing a primary ID column, single Fold Change column, one Sample1 column, and one Sample2 column. The Sample1 and Sample2 columns identify to which pairwise comparison each row belongs. This way multiple pairwise comparisons can be listed within the same DE-Sample file using a *single* fold change column. Examples of this format can be found in Sample\_Input/DE\_Sample/ folder.

| gene  | locus                    | sample_1 | sample_2 | log2(FC)  | p_value |
|-------|--------------------------|----------|----------|-----------|---------|
| FAM3A | chrX:154506158-154516242 | q1       | q2       | 2.73      | 0.0023  |
| FAM3A | chrX:154506158-154516242 | q3       | q4       | 0.0649976 | 0.81    |

2. Differential Expression Series Format (DE-Series) (Column-Format) File: This is a delimited text file containing a primary ID and multiple Fold Change columns. Each Fold Change column contains data pertaining to a single pairwise comparison. This way multiple pairwise comparisons can be listed within the same DE-Series file using *multiple* fold change columns. Examples of this format can be found in Sample\_Input/DE\_Series/ folder.

| gene  | locus                    | log2(FC) | p_value | log2(FC)2 | p_value2 |
|-------|--------------------------|----------|---------|-----------|----------|
| FAM3A | chrX:154506158-154516242 | 2.73     | 0.0023  | 0.0649976 | 0.81     |

## 2. A-Lister Functionality

A-Lister has two primary modes of operation: name list and differential expression. In differential expression mode A-Lister can be used to compare and filter lists of differentially expressed entities (DEEs) such as DEGs, DEPs, and DMPs/DMRs. The input text delimited files containing differential expression data can be filtered by any column. A common example is filtering input data based on p-value column to only include rows with p-value  $\leq 0.05$ . A-Lister assumes that the DEEs are listed in form of paired comparisons within the input files. That is every DEE in a given file belongs to some paired comparison between two conditions (e.g., treated vs control). These paired comparisons can be filtered based on the directionality (sign) of their respective fold changes. That is, all DEEs belonging to a particular paired comparison can be filtered based on the sign of their fold change.

In addition to column and directionality based filtering, A-Lister can compare paired comparisons with one another using set operations such as AND (intersect), FAND (fuzzy intersect), OR (union), and DIFF (difference). The combination of these filtering and set operations allows us to ask interesting questions (queries) about our data.

For example, suppose we have two paired comparisons in a single differential expression file or across two differential expression files. Paired comparison number one has a list of differentially expressed genes (DEGs) between the control group and group treated with drug #1. Paired comparison number two has a list of DEGs between control group and group treated with drug #2. We would like to know which genes were more highly expressed in control group than in groups treated with drug #1 and drug #2. This question can be represented by the following A-Lister query (CNTRL\*T1:DOWN-AND-CNTRL\*T2:DOWN). More complex queries can be constructed by comparing any number of paired comparisons from across an unlimited number of files. Order of operations can be enforced within the query by using parenthesis.

In name-list mode you can also perform set operations on lists of names. However, you cannot use any filtering operations.

#### A-Lister Filtering

A-Lister supports filtering differential expression files by columns (attributes). When filtering a DE-Sample file by an attribute the entire file is filtered. When filtering a DE-Series file by an attribute there are two possible behaviors. First, if the filter attribute belongs to a pairwise comparison, such as p-value2, then only that pairwise comparison is filtered. Second, if the filter attribute belongs to the entire file (e.g. ID column), then the entire file is filtered. Additionally, pairwise comparisons can be filtered by direction (sign of fold change) using the directional query argument.

### A-Lister Directional Query

A-Lister directional query is composed of pairwise comparison names, set operators, and optional directions. The pairwise comparison names are derived from the pairwise comparison mapping. The permitted set operators are: AND, FAND, OR, and DIFF.

### Set Operations

*AND* - intersection. An intersection of two sets returns a set of all the elements that are present within both sets.

*FAND* - fuzzy intersection. A fuzzy intersection of two sets returns a set of all the similar elements from within both sets. A customized Jaro-Winkler algorithm is used to calculate similarity. To be considered similar two strings must have have Jaro-Winkler score > 0.84.

Jaro-winkler algorithm: <http://users.cecs.anu.edu.au/~Peter.Christen/publications/tr-cs-06-02.pdf>

Example: [FRAC10, ALOC, BRAC] FAND [FRAC11, ALUK, PRAT14, MRA, BRAC] = [FRAC10, FRAC11, BRAC]

*OR* - union. A union of two sets returns all the elements present in either set.

*DIFF* - difference. A difference of two sets returns all the elements present in the first set, but not in the second.

### Directionality

*UP* - upregulated. Selects all entities whose fold change values are positive for a given pairwise comparison.

*DOWN* - downregulated. Selects all entities whose fold change values are negative for a given pairwise comparison.

*ALL* is a special modifier that results in multiple queries. In one query ALL is replaced by UP. In the other query ALL is replaced by DOWN. A query containing N ALL directions is transformed into N<sup>2</sup> queries. Each query is then executed and the results for each query are output into the output files.

Example 1: CNTRL\*T:ALL-AND-CNTRL\*T2 -> CNTRL\*T:UP-AND-CNTRL\*T2 , CNTRL\*T:DOWN-AND-CNTRL\*T2.

Example 2: CNTRL\*T:ALL-AND-CNTRL\*T2:ALL -> CNTRL\*T:UP-AND-CNTRL\*T2:UP , CNTRL\*T:UP-AND-CNTRL\*T2:DOWN , CNTRL\*T:DOWN-AND-CNTRL\*T2:UP , CNTRL\*T:DOWN-AND-CNTRL\*T2:DOWN.

*NONE* - the default direction for all pairwise comparisons.

### Pairwise Comparison Mapping

This is done differently depending on differential expression file type (DE-Sample or DE-Series). The goal of pairwise comparison mapping is to clearly indicate the names of pairwise comparisons and to which pairwise comparison every entry in the file belongs.

For DE-Sample files the user must map each label listed in the sample1 and sample2 columns to some unique, short, and descriptive new labels. For example, file Sample\_Input/DE\_Sample/GSE76453\_cuffdiff\_E2.diff contains two labels: q1 and q2. These labels are not descriptive and may conflict with labels contained in other differential expression files. A good mapping for these labels would be q1->Ctl, q2->ZNF143 based on GEO GSE76453 description. This mapping more clearly indicates what each condition represents. The q1\*q2 pairwise comparison will then be named based on these new labels as Ctl\*ZNF143.

For DE-Series files the user must come up with their own pairwise comparison names and map these names to all the columns that contain data pertaining to those pairwise comparisons. For example, file Sample\_Input/DE\_Series/GSE126785\_M2M4.csv contains two pairwise comparisons. These pairwise comparisons can be appropriately named as M2Low\*M2High and M4Low\*M4High based on the GEO GSE126785 experiment description. The correct mapping would then be M2Low\*M2High->log2(FC)M2,P-valueM2,P-adjM2 and M4Low\*M4High->log2(FC)M4,P-valueM4,P-adjM4. One of the mapped columns must always be a fold change column. The ID columns belong to all pairwise comparisons and therefore do not need to be mapped to any individual pairwise comparison.

### A-Lister Query (Non-Directional)

This is the query argument used in the name-list command. A non-directional query is composed of group names and set operators. The set operators are the same as in the directional query (i.e., AND, FAND, OR, DIFF). The group names are derived from the first (header) row of the name list files.

### 3. A-Lister Output

A-Lister's output is contained within several files. The result.txt file contains the name list of entities returned by the query. If an ALL direction query was requested the result file will contain a name list corresponding to each directional query generated from the all direction query. The filtered differential expression files are output in differential expression mode only. Additionally, a data\_dump.txt file is output containing information about how A-Lister executed the query. This information is primarily used for validation and or debugging.

#### A-Lister Output Structure

For Example 2: CNTRL\*T:ALL-AND-CNTRL\*T2:ALL ->

```
Query0: CNTRL*T:UP-AND-CNTRL*T2:UP
Query1: CNTRL*T:UP-AND-CNTRL*T2:DOWN
Query2: CNTRL*T:DOWN-AND-CNTRL*T2:UP
Query3: CNTRL*T:DOWN-AND-CNTRL*T2:DOWN
```

Output will be:

```
1)result.txt
2)data_dump.txt
3)FilteredDEFiles
--a)Query0 (CNTRL*T:UP-AND-CNTRL*T2:UP)
--b)Query1 (CNTRL*T:UP-AND-CNTRL*T2:DOWN)
--c)Query2 (CNTRL*T:DOWN-AND-CNTRL*T2:UP)
--d)Query3 (CNTRL*T:DOWN-AND-CNTRL*T2:DOWN)
```

## Graphical User Interface Documentation

---

This section demonstrates how to use the A-Lister graphical user interface using examples.

#### Name List Example

One name-list file: Sample\_Input/Name\_List/names\_comma.txt. There are 3 groups in this file: Control, Treated1, and Treated2. We want to find entities in common between Treated1 group and a union of Control and Treated2 groups. This will result in the following A-Lister query: Treated1-AND-(Control-OR-Treated2).

1. Select the name list execution mode.
2. Select Sample\_Input/Name\_List/names\_comma.txt file using the "Browse" button. Then select the corresponding input file delimiter (comma). Finally, click "Add File" in order to add file to the file selection area. A tab will appear. You can examine file previews (1st 5 lines of the file including column headers) within this tab to assist with setting remaining parameters.

A-Lister: bioinformatics software for comparison of differentially expressed entities such as genes, proteins, and methylation markers (DEGs, DEPs, DMPs/DMRs).




Differential Expression Mode: Filter and compare entities (genes, proteins, methylation markers, etc.) across pairwise comparisons.

Name List Mode: Compare multiple lists of names.

E:/Data/Sample\_Input/Name\_List/names\_comma.txt Browse

Comma

Add File Remove File Reset Files

File1

File 1 : E:/Data/Sample\_Input/Name\_List/names\_comma.txt

File Preview:

| Control | Treated1 | Treated2 |
|---------|----------|----------|
| AADACL2 | AADACP1  | AADACP1  |
| AADACL4 | DUSP5P1  | AMICA1   |
| AMIGO3  | AMOTL2   | AMIGO2   |
| DUSP21  | AMY1C    | AMPD3    |

Build Query

Type here to search

100%

1:31 AM  
9/19/2019

3. Either type the query into query input box or click "Build Query" and use the combination of group name and set operator buttons to build a query. Insert parenthesis into the query by typing in query box.
4. Select the output delimiter and output directory.
5. Select whether to run in verbose or silent mode. Setting verbose mode results in more information regarding A-Lister's execution being output into the data\_dump.txt file.
6. Click "generate command". This generates an appropriate CLI command.

A-Lister: bioinformatics software for comparison of differentially expressed entities such as genes, proteins, and methylation markers (DEGs, DEPs, DMPs/DMRs).

File1

File 1 : E:/Data/Sample\_Input/Name\_List/names\_comma.txt

File Preview:

| Control | Treated1 | Treated2 |
|---------|----------|----------|
| AADACL2 | AADACP1  | AADACP1  |
| AADACL4 | DUSP5P1  | AMICA1   |
| AMIGO3  | AMOTL2   | AMIGO2   |
| DUSP21  | AMY1C    | AMPD3    |

Build Query

Group Names:

Control Treated1 Treated2

Set Operators:

AND FAND OR DIFF

Treated1-AND-(Control-OR-Treated2)

Type here to search

44%

12:32 PM  
9/19/2019

7. You can then launch this command within GUI by clicking on the "Launch" button. When executing A-Lister via the GUI a box containing the results of the query will appear at the bottom of the GUI. Alternatively, you can copy the command from the command box and paste it into the command line. The output files will be generated either way.

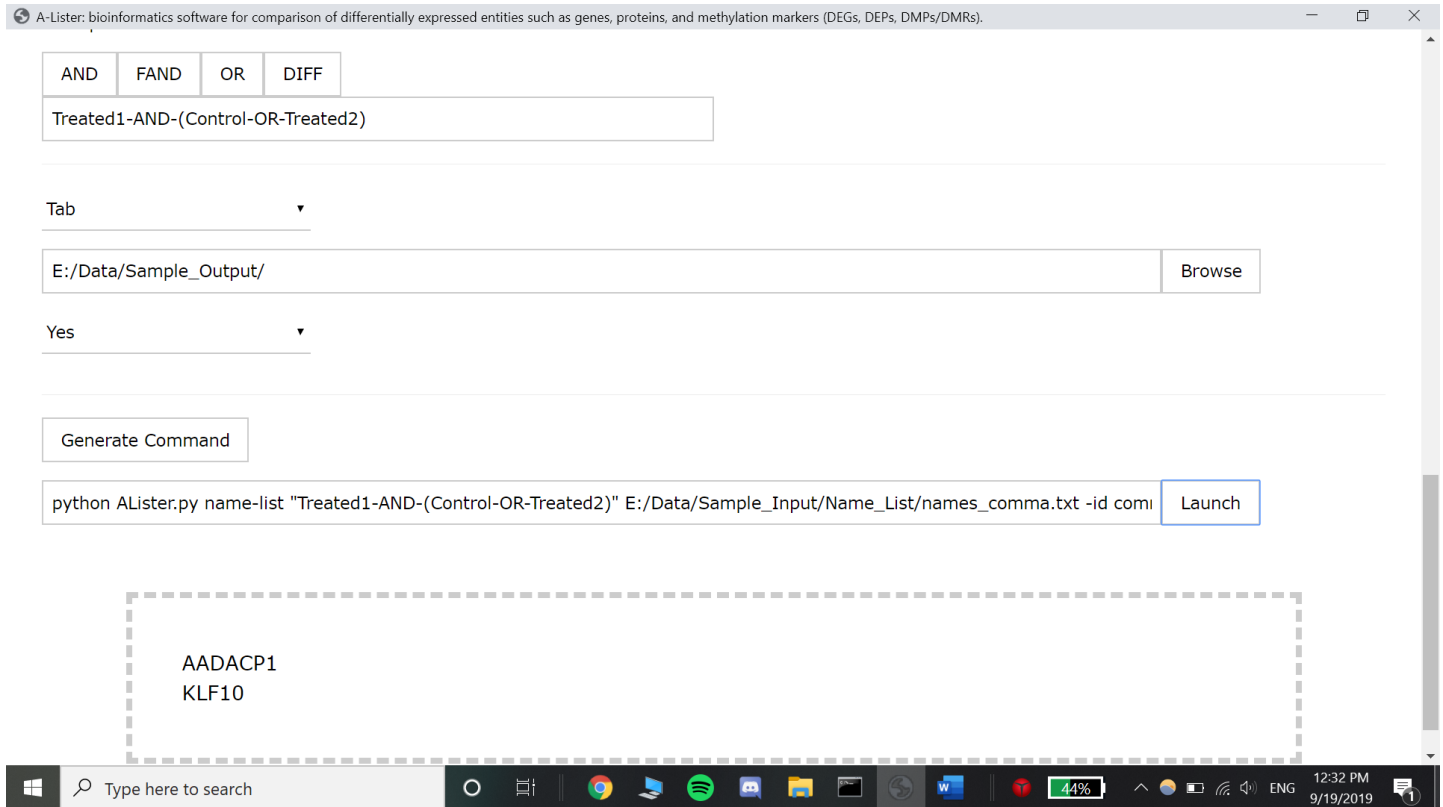

### Differential Expression Example

Two differential expression files: Sample\_Input/DE\_Series/GSE114528\_differential\_exp\_EVP\_D.tsv and Sample\_Input/DE\_Sample/GSE99397\_CreNeg-MHCPos\_vs\_CrePos-MHCNeg.diff. We want to find significantly differentially expressed genes in common between the EVP\*D and CreNeg\*CrePos pairwise comparisons. This will result in the following A-Lister query: EVP\*D-AND-CNEG\*CPOS.

1. Select the differential expression execution mode.
2. Select Sample\_Input/DE\_Series/GSE114528\_differential\_exp\_EVP\_D.tsv file using the "browse" button. Then select the corresponding input file delimiter (tab). Click "Add File" in order to add file to the file selection area. Click on "File1" in the file selection tab bar.

A-Lister: bioinformatics software for comparison of differentially expressed entities such as genes, proteins, and methylation markers (DEGs, DEPs, DMPs/DMRs).

# A-Lister

Select the comparison mode:



Differential Expression Mode: Filter and compare entities (genes, proteins, methylation markers, etc.) across pairwise comparisons.



Name List Mode: Compare multiple lists of names.

File Path: E:/Data/Sample\_Input/DE\_Sample/GSE99397\_CreNeg-MHCPos\_vs\_CrePos-MHCNeg.diff Browse

Tab: Add File Remove File Reset Files

File1 File2

File1 : E:/Data/Sample\_Input/DE\_Series/GSE114528\_differential\_exp\_EVP\_D.tsv

File Preview:

| Ensembl_Gene_ID    | Gene_Name | Chromosome_Name | Gene_Start | Gene_End  | baseMean         | log2FoldChange   | lfcSE             | stat            |
|--------------------|-----------|-----------------|------------|-----------|------------------|------------------|-------------------|-----------------|
| ENSMUSG00000026670 | Uap1      | 1               | 170141938  | 170174957 | 5402.72618910258 | 3.79482894763795 | 0.148039086304213 | 25.633966288063 |

3. Select the differential expression file type (DE-Series). Verify that the ID Column Name is correct. In this example we want to use Gene\_Name column. Click on "Add PC Map" in order to add a pairwise comparison mapping for this file. Name the pairwise comparison EVP\*D. Then select the appropriate fold change column. If this file contains only a single pairwise comparison than it is not necessary to select additional columns.

A-Lister: bioinformatics software for comparison of differentially expressed entities such as genes, proteins, and methylation markers (DEGs, DEPs, DMPs/DMRs).

# A-Lister

File Path: E:/Data/Sample\_Input/DE\_Series/GSE114528\_differential\_exp\_EVP\_D.tsv

File Preview:

| Ensembl_Gene_ID    | Gene_Name | Chromosome_Name | Gene_Start | Gene_End  | baseMean         | log2FoldChange   | lfcSE             | stat            |
|--------------------|-----------|-----------------|------------|-----------|------------------|------------------|-------------------|-----------------|
| ENSMUSG00000026670 | Uap1      | 1               | 170141938  | 170174957 | 5402.72618910258 | 3.79482894763795 | 0.148039086304213 | 25.633966288063 |
| ENSMUSG00000024053 | Emilin2   | 17              | 71252176   | 71310965  | 3461.63951627599 | 6.11773802360099 | 0.245781276828775 | 24.890984791583 |
| ENSMUSG00000019929 | Dcn       | 10              | 97479609   | 97518143  | 54616.957183034  | 9.26243767233602 | 0.409421388477496 | 22.623238387178 |
| ENSMUSG00000040249 | Lrp1      | 10              | 127538161  | 127621148 | 3705.78098720933 | 5.40160128190006 | 0.240522499147434 | 22.457779629958 |

DE-Series: DE-Series

ID Column Name: Gene\_Name

Add PC Map Remove PC Map Reset PC Map

Map1

PC Name1: EVP \* D

FC Column: log2FoldChange

Additional Columns:

Add Remove

4. Add filters. Herein, we have added fold change, adjusted p-value, and base mean based filters.

A-Lister: bioinformatics software for comparison of differentially expressed entities such as genes, proteins, and methylation markers (DEGs, DEPs, DMPs/DMRs).

DE-Series

ID Column Name:

Add PC Map Remove PC Map Reset PC Map

Map1

PC Name1: EVP \* D

FC Column:

Additional Columns:

Add Filter Remove Filter Reset Filters

|                |        |              |
|----------------|--------|--------------|
| log2FoldChange | : abs> | Cutoff: 2.5  |
| padj           | : <    | Cutoff: 1E-5 |
| baseMean       | : >    | Cutoff: 500  |

Build Query

Query

5. Select Sample\_Input/DE\_Sample/GSE99397\_CreNeg-MHCPos\_vs\_CrePos-MHCNeg.diff file using the "browse" button. Then select the corresponding input file delimiter (tab). Click "Add File" in order to add file to the file selection area. Click on "File2" in the file selection tab bar.

6. Select DE-Sample file type. Verify that the ID, Fold Change, Sample1, and Sample2 column names are correct.

A-Lister: bioinformatics software for comparison of differentially expressed entities such as genes, proteins, and methylation markers (DEGs, DEPs, DMPs/DMRs).

File2 : E:/Data/Sample\_Input/DE\_Sample/GSE99397\_CreNeg-MHCPos\_vs\_CrePos-MHCNeg.diff

File Preview:

| test_id            | gene_id            | gene  | locus                    | sample_1      | sample_2      | status | value_1 | value_2  | log2(f |
|--------------------|--------------------|-------|--------------------------|---------------|---------------|--------|---------|----------|--------|
| ENSMUSG00000000001 | ENSMUSG00000000001 | Gnai3 | chr3:107910197-107949064 | CrePos-MHCNeg | CreNeg-MHCPos | OK     | 41.3233 | 42.522   | 0.0412 |
| ENSMUSG00000000003 | ENSMUSG00000000003 | Pbsn  | chrX:75083239-75098962   | CrePos-MHCNeg | CreNeg-MHCPos | NOTEST | 0       | 0.215109 | inf    |
| ENSMUSG00000000028 | ENSMUSG00000000028 | Cdc45 | chr16:18780539-18835354  | CrePos-MHCNeg | CreNeg-MHCPos | OK     | 5.11222 | 3.0439   | -0.748 |
| ENSMUSG00000000031 | ENSMUSG00000000031 | H19   | chr7:149761433-149764048 | CrePos-MHCNeg | CreNeg-MHCPos | NOTEST | 1.07113 | 1.65121  | 0.6243 |

DE-Sample

ID Column Name:

Fold Change Column Name(s):

Sample1 Column Name:

Sample2 Column Name:

7. Change the value for ID Column Name from test\_id to gene. Click on "Build PC Map". Map the file specific sample labels to new label names of your choice. Add filters. Herein, we have added fold change and p-value filters.



A-Lister: bioinformatics software for comparison of differentially expressed entities such as genes, proteins, and methylation markers (DEGs, DEPs, DMPs/DMRs).

|                    |                    |     |                          |               |               |        |         |         |          |   |   |
|--------------------|--------------------|-----|--------------------------|---------------|---------------|--------|---------|---------|----------|---|---|
| ENSMUSG00000000031 | ENSMUSG00000000031 | H19 | chr7:149761433-149764048 | CrePos-MHCNeg | CreNeg-MHCPos | NOTEST | 1.07113 | 1.65121 | 0.624395 | 0 | 1 |
|--------------------|--------------------|-----|--------------------------|---------------|---------------|--------|---------|---------|----------|---|---|

DE-Sample:

ID Column Name:

Fold Change Column Name(s):

Sample1 Column Name:

Sample2 Column Name:

Build PC Map

CrePos-MHCNeg->

CreNeg-MHCPos->

Add Filter Remove Filter Reset Filters

|                   |        |              |
|-------------------|--------|--------------|
| log2(fold_change) | : abs> | Cutoff: 0.85 |
| p_value           | : <    | Cutoff: 0.05 |

8. Either directly enter the query or click on build query and use the pairwise comparison, set operator, and directionality buttons. You can manually insert parenthesis into the query in order to change order of operations. However, it is not necessary for this simple query.

A-Lister: bioinformatics software for comparison of differentially expressed entities such as genes, proteins, and methylation markers (DEGs, DEPs, DMPs/DMRs).

Build Query

Pairwise Comparisons:

Set Operators:

Directionality:

Tab:

E:/Data/Sample\_Output

Yes

Generate Command

`python ALister.py diff-expression E:/Data/Sample_Input/DE_Series/GSE114528_differential_exp_EVP_D.tsv E:/Data/Sample_Input/DE_Sample/GSE99397_C`

9. Select the output delimiter and output directory.
10. Select whether to run in verbose or silent mode.
11. Click generate command. This generates an appropriate CLI command.

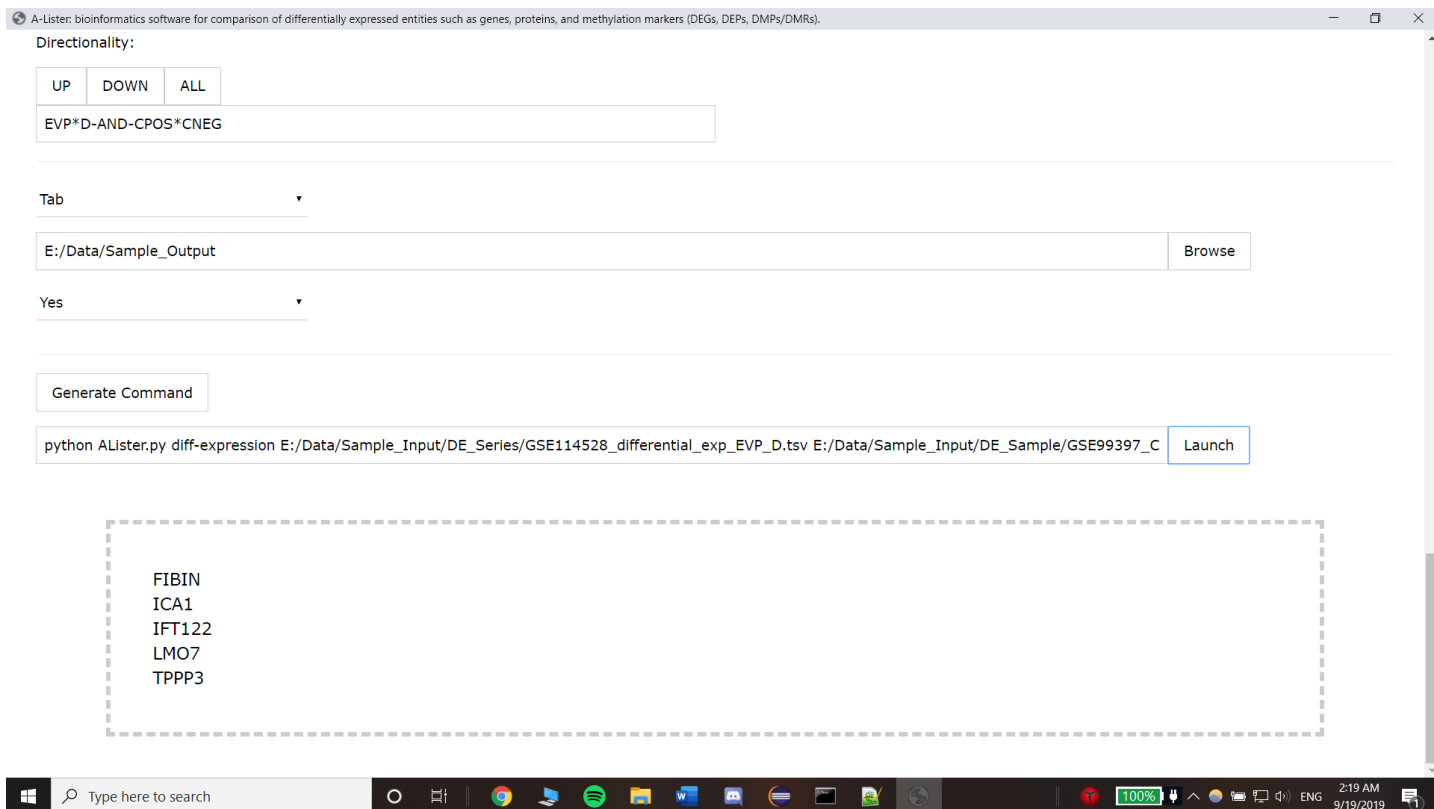

12. You can then launch this command within GUI or by pasting it into command line. Note that the output within the GUI shows the results of a single query only. The complete results can be found in output files.

## Command Line Interface Documentation

### A-Lister Help

```
$ python ALister_CLI.py --help
```

usage:

```
ALister_CLI.py command
```

commands:

```
diff-expression Analyze differential expression data.
```

```
name-list Analyze name list data.
```

A-Lister v1.1: a differentially expressed entities analysis package. Namely, A-Lister assists in identification of top genes, proteins, and methylation markers of interest across multiple pairwise comparisons.

positional arguments:

```
{name-list,diff-expression}
```

optional arguments:

```
-h, --help show this help message and exit
```

### Name List Help & Example Commands

```
$ python ALister_CLI.py name-list --help
```

```
$ python ALister_CLI.py name-list --examples
```

### Differential Expression Help & Example Commands

```
$ python ALister_CLI.py diff-expression --help
```

```
$ python ALister_CLI.py diff-expression --examples
```

## Future Development Roadmap

---

1. Pip packaging. User interface update.
2. ID validation and mapping. Genomic types integration.
3. Web interface.

## Acknowledgements

---

The following Gene Expression Omnibus datasets are used as sample and test input within A-Lister: GSE76453, GSE116610, GSE108643, GSE75035, GSE77137, GSE126785, GSE101484, GSE99397, GSE114528. <https://www.ncbi.nlm.nih.gov/geo/query/acc.cgi>

## Authors

---

Stanislav Listopad and Trina Norden-Krichmar

## Appendix

---

Below are the help menus and partial lists of examples for name-list and diff-expression commands.

### A-Lister Name-List Help Menu

```
$ python ALister_CLI.py name-list --help
usage:
  ALister_CLI.py name-list <query> <input-file> [<input-file> ...] [options]
  ALister_CLI.py name-list (-e | --examples)
  ALister_CLI.py name-list (-h | --help)
```

Analyze name list data.

positional arguments:

|              |                                                                                                                                                                                                                                                                                                                                                                                                                                                                                                                                                      |
|--------------|------------------------------------------------------------------------------------------------------------------------------------------------------------------------------------------------------------------------------------------------------------------------------------------------------------------------------------------------------------------------------------------------------------------------------------------------------------------------------------------------------------------------------------------------------|
| <query>      | The non-directional query argument is used to perform set operations on name lists. The group names are derived from the 1st row (column headers) of the delimited text file. The following set operations are permitted: AND, FAND, DIFF, OR. AND = intersect, FAND = fuzzy intersect, DIFF = difference, and OR = union. Additionally, parenthesis can be used to set order of operations. The query argument must be surrounded by quote marks. Example: "(CONTROL-OR-TREATED1)-AND-(TREATED2)"<br>Permitted characters: alphanumeric, (), and -. |
| <input-file> | Full path to the input file.                                                                                                                                                                                                                                                                                                                                                                                                                                                                                                                         |

optional arguments:

|                                               |                                                                                                                                                                                                                                                             |
|-----------------------------------------------|-------------------------------------------------------------------------------------------------------------------------------------------------------------------------------------------------------------------------------------------------------------|
| -h, --help                                    | show this help message and exit                                                                                                                                                                                                                             |
| -e, --examples                                | show examples and exit                                                                                                                                                                                                                                      |
| -id <input_delimiter> [<input_delimiter> ...] | The delimiter used within the input file.<br>List once if all input files use the same delimiter.<br>List for every file - in the same order as that of the input files - if delimiter varies between input files.<br>Options: tab and comma. Default: tab. |
| -o <output_directory>                         | The output directory. Default: current working directory.                                                                                                                                                                                                   |
| -od <output_delimiter>                        | The delimiter used in the result file.<br>Options: tab, comma-row. Default: tab.                                                                                                                                                                            |
| -v                                            | Make the output more verbose.                                                                                                                                                                                                                               |

### A-Lister Diff-Expression Help Menu

```
$ python ALister_CLI.py diff-expression --help
usage:
ALister_CLI.py diff-expression <input-file> [<input-file> ...] -pc <pc-mapping> [<pc-mapping> ...] -dq <direct-query>
[options]
ALister_CLI.py diff-expression (-e | --examples)
ALister_CLI.py diff-expression (-h | --help)
```

Analyze differential expression data.

positional arguments:

<input-file> Full path to the input file.

required arguments:

-pc <pc-mapping> [<pc-mapping> ...]

The pairwise comparison mapping argument is used to indicate the names and the layout of pairwise comparisons within the input file. The formatting of this argument is dependent on the format of the input file (DE-Sample or DE-Series). Within DE-Sample files each entry (row) in a file is already assigned to a pairwise comparison via the labels in sample1 and sample2 columns. A-Lister requires the user to assign each of these file labels new names. For example, assume that there is a DE-Sample file with labels q1, q2, q3, and q4 that represent the control, treated1, treated2, and treated3 conditions. The user would then specify the following mapping: -pc "q1->CNTRL,q2->T1,q3->T2,q4->T3". DE-Series files usually do not specify pairwise comparison names. Therefore, the user must provide their own pairwise comparison names and then map these names to the appropriate columns. For example, assume that there is a DE-Series file with five columns: gene, log2(FC)1, P-value1, log2(FC)2, and P-value2. Assume that this file contains two pairwise comparisons: day0 vs day7 and day7 vs day14. Columns log2(FC)1 and P-value1 contain data for day0 vs day7 comparison. Columns log2(FC)2 and P-value2 contain data for day7 vs day14 comparison. The user would then specify the following mapping: -pc "d0\*d7->log2(FC)1,P-value1;d7\*d14->log2(FC)2,P-value2" The star represents versus. Each pairwise comparison must be assigned one unique fold change column (e.g. log2(FC)1 and log2(FC)2 above). For DE-Series files containing a single pairwise comparison it is sufficient to list only the name of the fold change column. For example, assume that the log2(FC)2 and P-value2 columns were removed from the above mentioned file. The appropriate mapping for this new file would be either -pc "day0\*day7->log2(FC)1" or -pc "day0\*day7->log2(FC)1,P-value1". The pairwise comparison mapping argument must be surrounded by quote marks. Permitted characters: alphanumeric, (), \*, ;, -, >.

-dq <direct-query>

The directional query argument is used to perform set operations on pairwise comparisons from differential expression data and to apply directional filtering. The following set operations are permitted: AND, FAND, DIFF, OR. AND = intersection, DIFF = difference, OR = union, FAND = fuzzy intersection. Additionally, parenthesis can be used to nest and to set order of operations. Each pairwise comparison listed in the query can be assigned a direction of UP, DOWN, ALL. All pairwise comparisons have a direction of NONE by default. UP in context of pairwise group comparison q1\*q2 means that q2 contains higher expression of this entity than q1. As in fold change -  $\log_2(q_2/q_1)$  - is a positive value. ALL direction is a special modifier that results in multiple queries. In one query ALL is replaced by UP. In the other query ALL is replaced by DOWN. A query containing N ALL directions is transformed into N<sup>2</sup> queries. Each query is then executed and the results for each query are output into the output files. The names of pairwise comparisons are constructed using the pairwise comparison mapping (refer to -pc option). The query argument must be surrounded by quote marks. Example: "(CNTRL\*T1:UP-AND-CNTRL\*T2:UP)-DIFF-CNTRL2\*T3" Permitted characters: alphanumeric, (), \*, :, and -.

optional arguments:

-h, --help show this help message and exit

```

-e, --examples      show examples and exit
-n <id-column> [<id-column> ...]
    The name of id column within the input files.
    List once if all input files have the same column name.
    List for every file - in same order as that of the input files -
    if column name varies between input files. The id column argument
    must be surrounded by quote marks. Default: Id.
-fc <fc-column> [<fc-column> ...]
    The names of fold change columns within the input files.
    List once if all input files have the same column names.
    List for every file - in same order as that of the input files -
    if column names vary between input files. Multiple fold change
    columns can be listed for DE-Series files. When listing
    multiple fold change columns for a DE-Series file delimit
    the column names with commas. The fold change column argument
    must be surrounded by quote marks.
    Default: log2(fold_change).
-s1 <sample1-column> [<sample1-column> ...]
    The name of sample1 column within the input files.
    List once if all input files have the same column name.
    List for every file - in same order as that of the input
    files - if column name varies between input files. For DE-Series
    files the sample1 column name must be listed as "NONE".
    The sample1 column argument must be surrounded by
    quote marks. Default: NONE.
-s2 <sample2-column> [<sample2-column> ...]
    The name of sample2 column within the input files.
    List once if all input files have the same column name.
    List for every file - in same order as that of the input
    files - if column name varies between input files. For DE-Series
    files the sample2 column name must be listed as "NONE".
    The sample2 column argument must be surrounded by
    quote marks. Default: NONE.
-f <filter-by-column> [<filter-by-column> ...]
    The names of columns by which to filter the files alongside
    the respective comparison operators and comparison constant values.
    List once if you would like to filter all files the same way.
    List for every file - in same order as that of the input files -
    otherwise. If you would like to filter some, but not all of the
    files, write "NONE" for the files that you do not want to be filtered.
    The following comparison operators are permitted: lt (a<b),
    le (a<=b), gt (a>b), ge (a>=b), eq (a==b), ne (a!=b),
    alt (|a|<b), ale (|a|<=b), agt (|a|>b), age (|a|>=b),
    aeq (|a|==b), ane (|a|!=b).
    This argument must be surrounded by quote marks.
    Example: "log2(fold_change):agt1.2,p_value:lt0.05,q_value:lt0.05."
-id <input_delimiter> [<input_delimiter> ...]
    The delimiter used within the input file.
    List once if all input files use the same delimiter.
    List for every file - in the same order as that of the
    input files - if delimiter varies between input files.
    Options: tab, comma, colon, semicolon, space.
    Default: tab.
-o <output_directory>
    The output directory. Default: current working directory.
-od <output_delimiter>
    The delimiter/format used in the result file.
    Options: tab, comma-row. Default: tab.
-v
    Make the output more verbose.

```

## A-Lister Name-List Examples

```

$ python ALister_CLI.py name-list --examples
# Example Name List 1:
# One name-list file. Three groups: Control, Treated1, and Treated2.
# Query is an intersection of two groups.

```

```
python ALister_CLI.py name-list "Treated1-AND-Treated2" E:/Data/Sample_Input/Name_List/names_comma.txt
-id comma -o E:/Data/Sample_Output/Name_List/Example1 -od tab -v
```

```
# Example Name List 2:
# Two name-list files. Complex query across groups from both files.
```

```
python ALister_CLI.py name-list "Set1-DIFF-(Control-OR-(Treated1-AND-Treated2))" E:/Data/Sample_Input/Name_List/fileA.txt
E:/Data/Sample_Input/Name_List/names_comma.txt -id tab comma -o E:/Data/Sample_OutputName_List/Example2 -od comma-row -v
```

## A-Lister Diff-Expression Examples

```
$ python ALister_CLI.py diff-expression --examples
```

```
Example Set 1 - DE-Sample Files Only:
```

```
-----
# Exercise in Obese vs Lean Individuals (DE Example 3):
# One Cuffdiff file with four condition labels (LeanPre,LeanPost,OvobPre,OvobPost).
# Filter file with several attributes. Launch an ALL direction query (4 direction patterns - UU,UD,DU,DD).
```

```
python ALister_CLI.py diff-expression E:/Data/Sample_Input/DE_Sample/GSE108643_Cuffdiff.txt
-pc "LeanPre->LPE,LeanPost->LPO,OvobPre->OPE,OvobPost->OPO" -dq "LPE*LPO:ALL-AND-OPE*OPO:ALL"
-o E:/Data/Sample_Output/DE/Example3 -f "log2(fold_change):agt1.0,q_value:lt0.05,value_1:gt1.0,value_2:gt1.0"
-v -s1 "sample_1" -s2 "sample_2" -n "gene"
```

```
Example Set 2 - DE-Series files only:
```

```
-----
# Effect of Oxygen Saturation on Stem Cells (DE Example 7):
# Three DESeq2 files with one pairwise comparison in each file.
# Filter the pairwise comparisons across both files according to fold change.
# Execute a complex query across all pairwise comparisons.
```

```
python ALister_CLI.py diff-expression E:/Data/Sample_Input/DE_Series/GSE126785_M2.txt
E:/Data/Sample_Input/DE_Series/GSE126785_M4.txt E:/Data/Sample_Input/DE_Series/GSE126785_M5.txt
-pc "M2Low*M2High->3.log2(FC)" "M4Low*M4High->3.log2(FC)" "M5Low*M5High->3.log2(FC)"
-dq "M2Low*M2High-DIFF-(M5Low*M5High-OR-M4Low*M4High)" -o E:/Data/Sample_Output/DE/Example7 -n "1.GeneID"
-f "3.log2(FC):agt1.0" -fc "3.log2(FC)" -v
```

```
Example Set 3 - DE-Series and DE-Sample files:
```

```
-----
Melanoma in Mice (DE Example 8):
# One Cuffdiff and one DESeq2 file with one pairwise comparison in each file.
# Filter the Cuffdiff file according to fold change and p-value.
# Filter the DESeq2 file according to base mean, fold change, and adjusted p-value.
# Execute a query across EVP*D and CPOS*CNEG pairwise comparisons.
```

```
python ALister_CLI.py diff-expression E:/Data/Sample_Input/DE_Series/GSE114528_differential_exp_EVP_D.tsv
E:/Data/Sample_Input/DE_Sample/GSE99397_CreNeg-MHCPos_vs_CrePos-MHCNeg.diff -pc "EVP*D->log2FoldChange"
"CrePos-MHCNeg->CPOS,CreNeg-MHCPos->CNEG" -dq "EVP*D-AND-CPOS*CNEG" -fc "log2FoldChange" "log2(fold_change)"
-o E:/Data/Sample_Output/DE/Example8 -od comma-row -f "padj:lt1E-5,log2FoldChange:agt2.5,baseMean:gt500"
"log2(fold_change):agt0.85,p_value:lt0.05" -v -s1 "NONE" "sample_1" -s2 "NONE" "sample_2" -n "Gene_Name" "gene"
```
